# Supplementary material
Source: MDPI journal article supplement (https://www.mdpi.com/2673-4583/10/1/39)
Supplement: s1 [file s1]

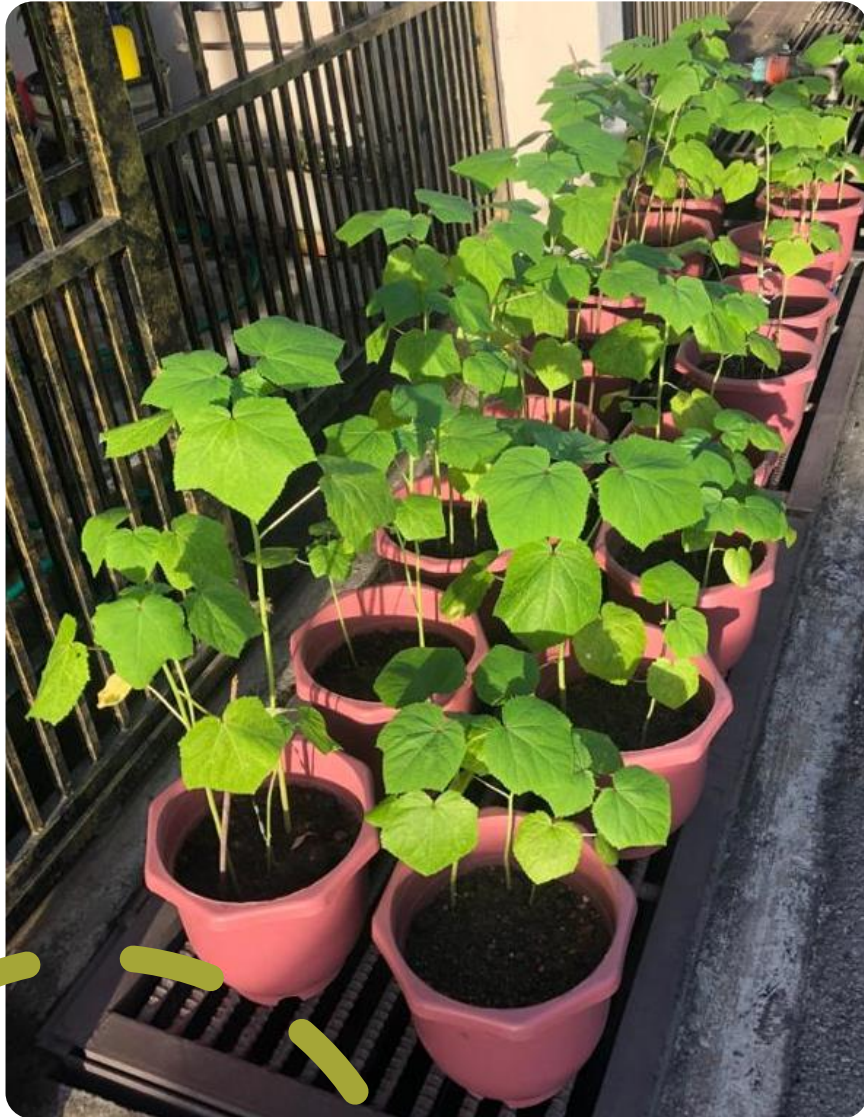

IOCAG  
2022

The 1st International Online Conference on Agriculture:  
ADVANCES IN AGRICULTURAL SCIENCE AND TECHNOLOGY  
10-25 FEBRUARY 2022 | ONLINE

# Unravelling Synergistic Effects of Palm Bunch Ash and Glutathione on Plant Growth

Participant: Koh Yi Sze

University: Monash University Malaysia

Faculty: School of Engineering

Supervisors: Dr Patrick Tang, Dr Goh Bey Hing

# Introduction: Palm bunch ash (PBA)

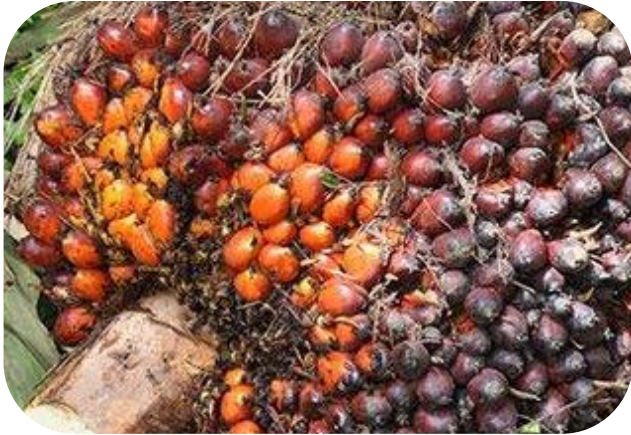

**Fresh Fruit Bunch (FFB)**

- Palm oil cultivated from mesocarps of the oil palm fruits

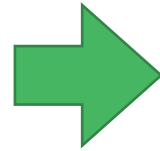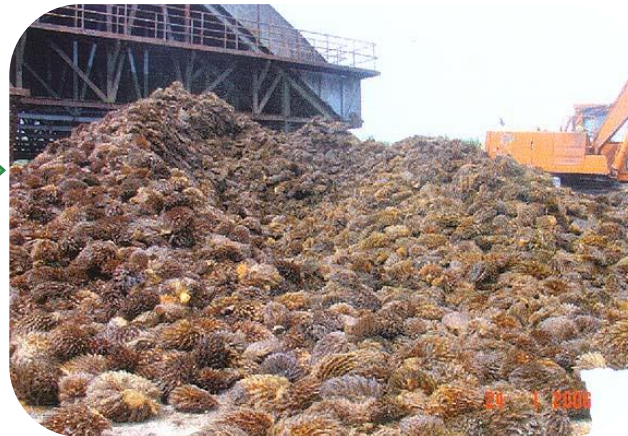

**Empty Fruit Bunch (EFB)**

- 22% of FFB, major waste
- Mostly incinerated to be disposed

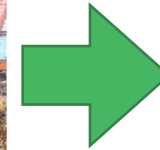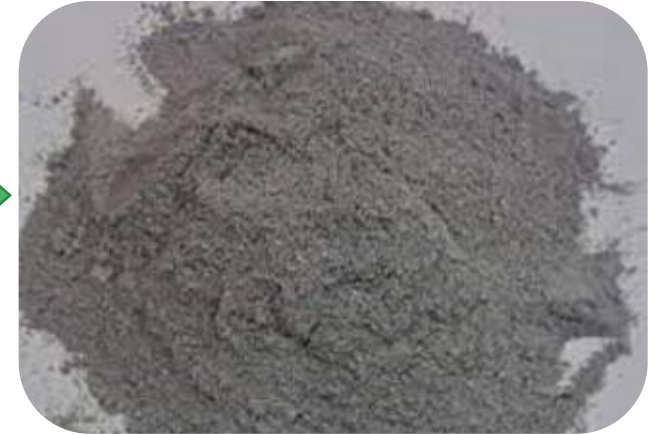

**Palm Bunch Ash (PBA)**

- $> \text{pH } 7$  & rich in potassium
- Reduces soil acidity and acts as a potash fertiliser [1]

# Introduction: Glutathione (GSH)

GSH is a tripeptide, found abundantly in most plant tissue

Roles: Antioxidant, regulates enzymatic & photosynthetic activities

Induced by abiotic stresses; Inhibited by extreme stresses.

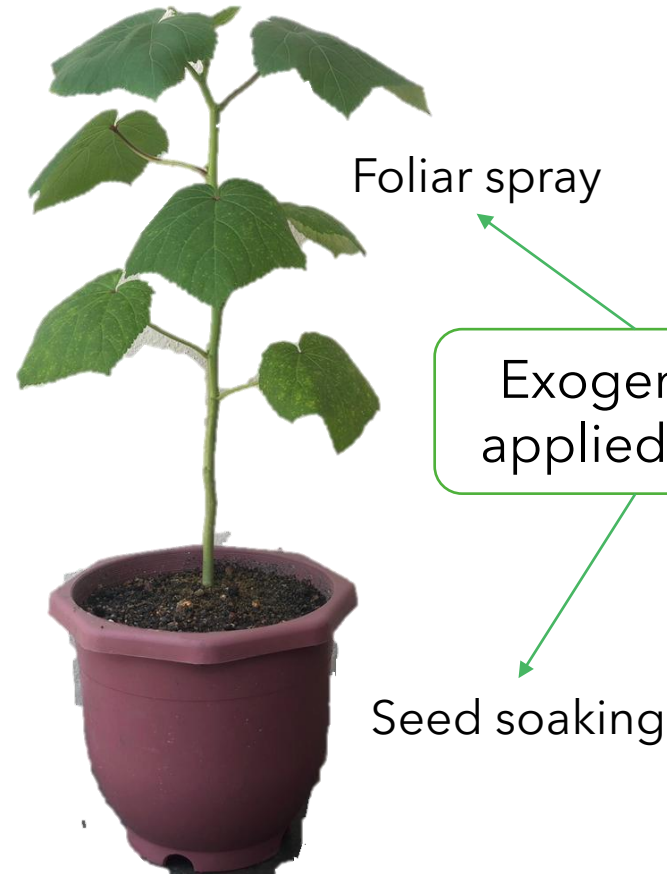

Mitigate oxidative stress and damage to plants ✓

Improved growth and yield of various plants [2] ✓



# Problem Statement

- Plants are susceptible to environmental stresses.
- Individual application of PBA and GSH improve growth of plants.
- However, there is yet to be a research on the effects of the **combined application** of PBA and GSH on plant growth

## Objective

- **To assess the effects of PBA, GSH and their combined application** on okra plant growth through:
  - Examination of growth parameters like **plant height, stem girth, number of leaves per plant** and **leaf area**.

# Experimental Design

4 groups , 4 replicate pots & 6 seeds each:

## A. Control group

- Water-soaked & planted in black soil (3 kg) only

## B. PBA group

- Water-soaked & planted in PBA-soil (200 g: 3 kg) mix

## C. GSH group

- GSH-soaked (100 mg/L) & planted in black soil (3 kg) only

## D. PBA-GSH (Combination) group

- GSH-soaked (100 mg/L) & planted in PBA-soil (200 g: 3 kg) mix

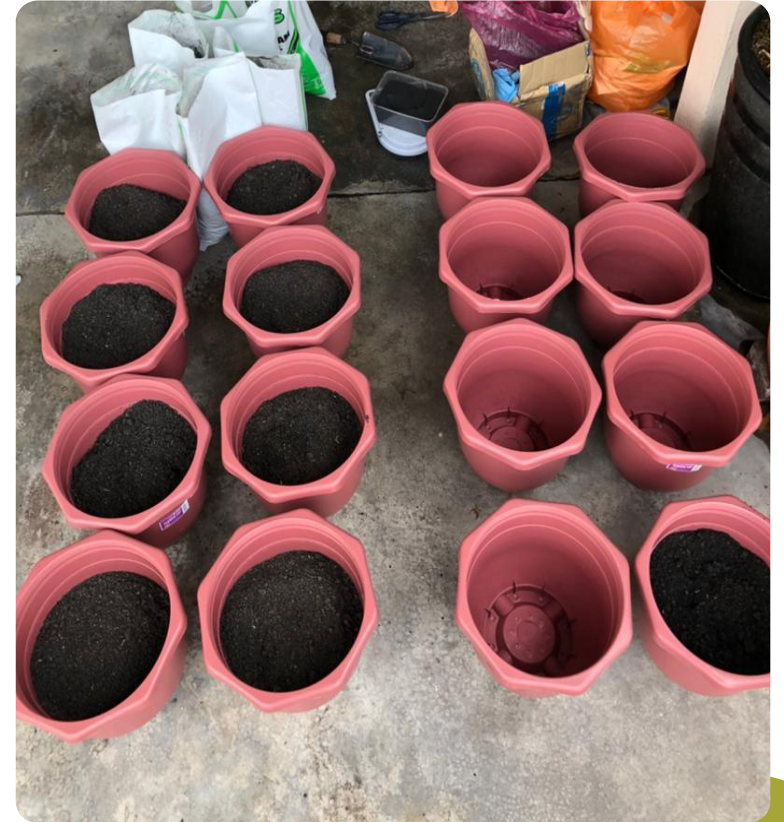

# Experimental Procedures

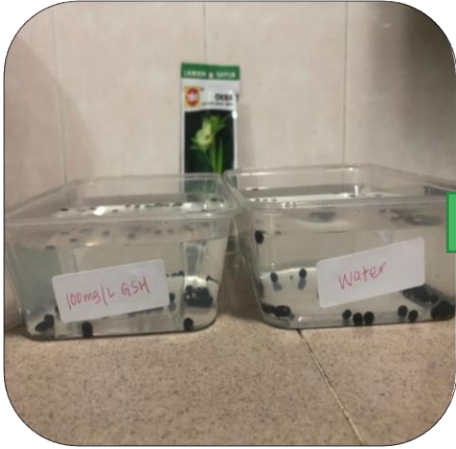

## 1) Seed Soaking

- 60 seeds in GSH
- 60 seeds in water

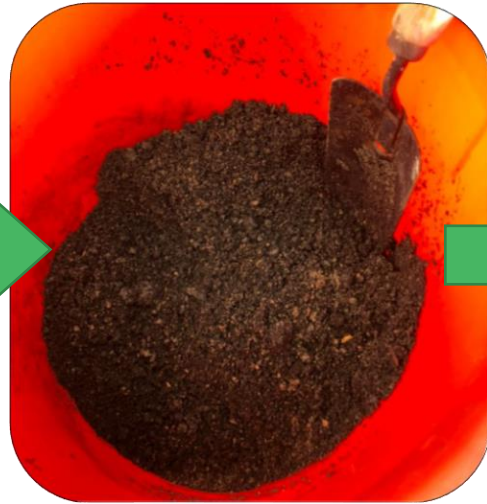

## 2) PBA: Soil Mixing

- 200g PBA: 3 kg black soil for 8 pots

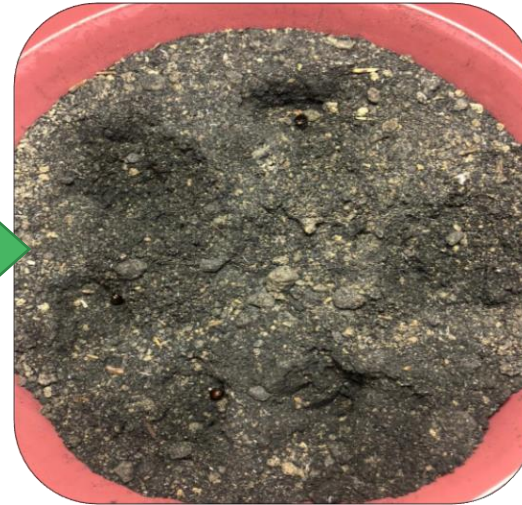

## 3) Planting

- 6 seeds in each pot accordingly
- Watered daily

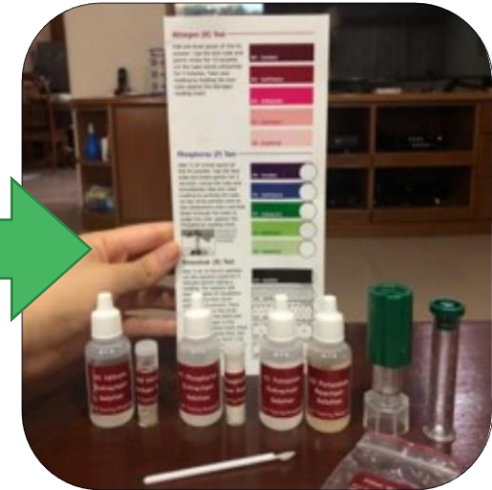

## 4) pH & NPK Soil Test

- Soil samples added with reagents
- Compared against colour charts

# Results & Discussion

Soil Test, Plant Height, Stem Girth,  
Number of Leaves per Plant, Leaf  
Area

# Soil Test

For NPK level: 0 = depleted, 1 = deficient, 2 = adequate, 3 = sufficient, and 4 = surplus.

| Soil Sample   | Day 0      |       |              | Day 42                     |                          |                        |                              |
|---------------|------------|-------|--------------|----------------------------|--------------------------|------------------------|------------------------------|
|               | Black soil | PBA   | PBA-soil mix | Control group (Black soil) | PBA group (PBA-soil mix) | GSH group (Black soil) | PBA-GSH group (PBA-soil mix) |
| pH            | 6.5        | > 7.5 | 7            | 6.5                        | 7                        | 6.5                    | 7                            |
| Nitrogen, N   | N2         | N0    | N2           | N2                         | N2                       | N2                     | N2                           |
| Phosphorus, P | P3         | P3    | P3           | P3                         | P3                       | P3                     | P3                           |
| Potassium, K  | K2         | K4    | K4           | K2                         | K4                       | K2                     | K4                           |

- No change in properties; pH: 6.5 - black soil, 7 - PBA-soil mix.
- Nitrogen level **adequate**; Phosphorus level **sufficient** in all soils
- Potassium level **surplus** for PBA-soil mix



# Plant Height

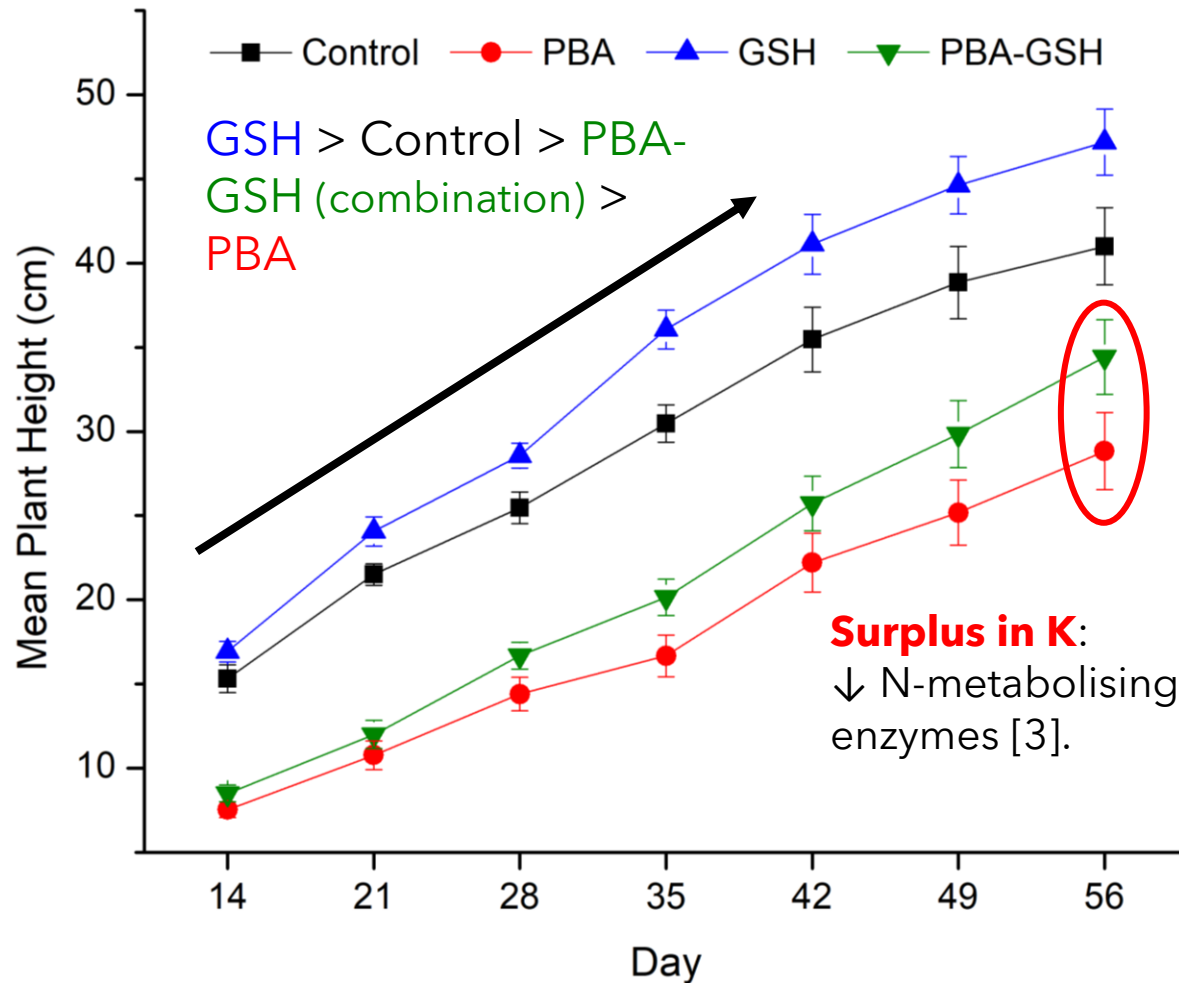

# Stem Girth

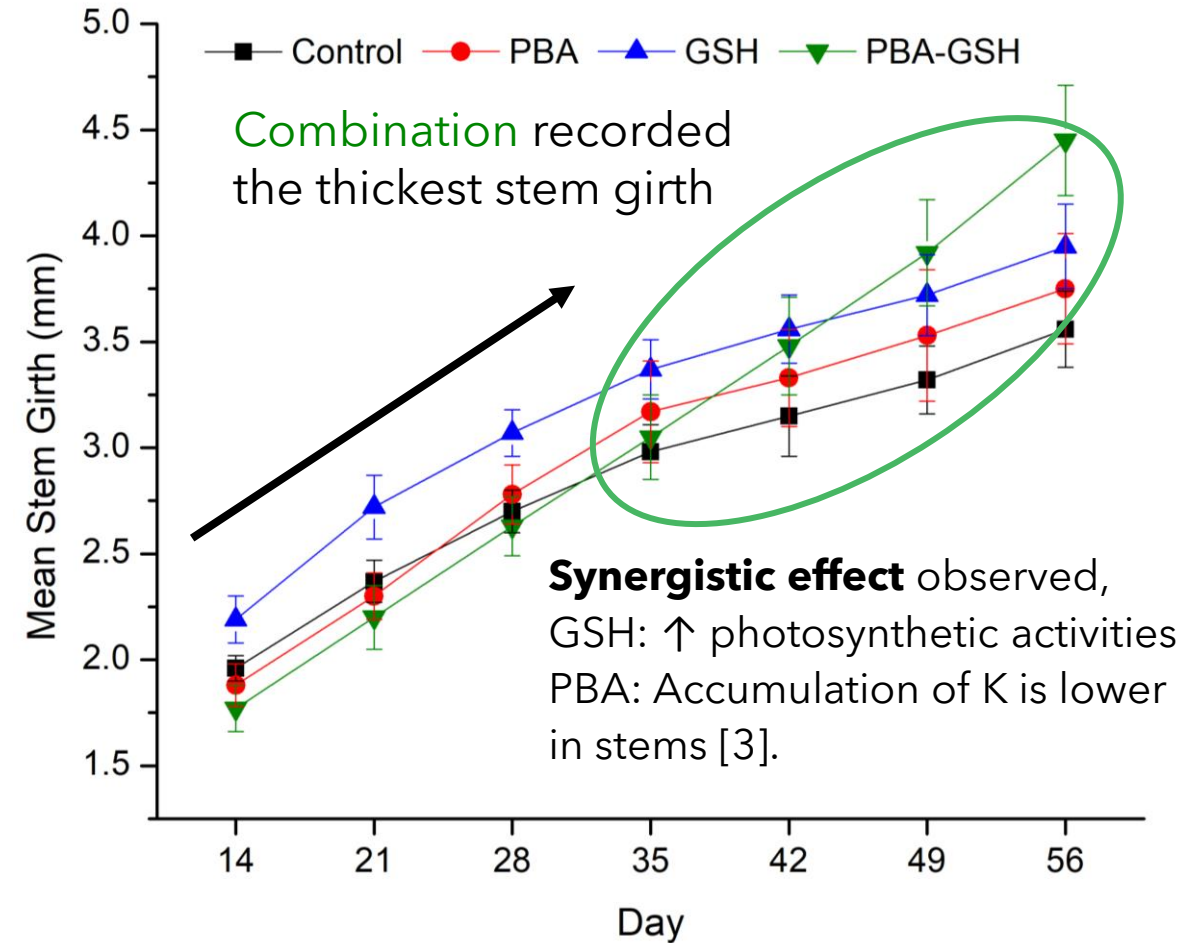

# No. of leaves

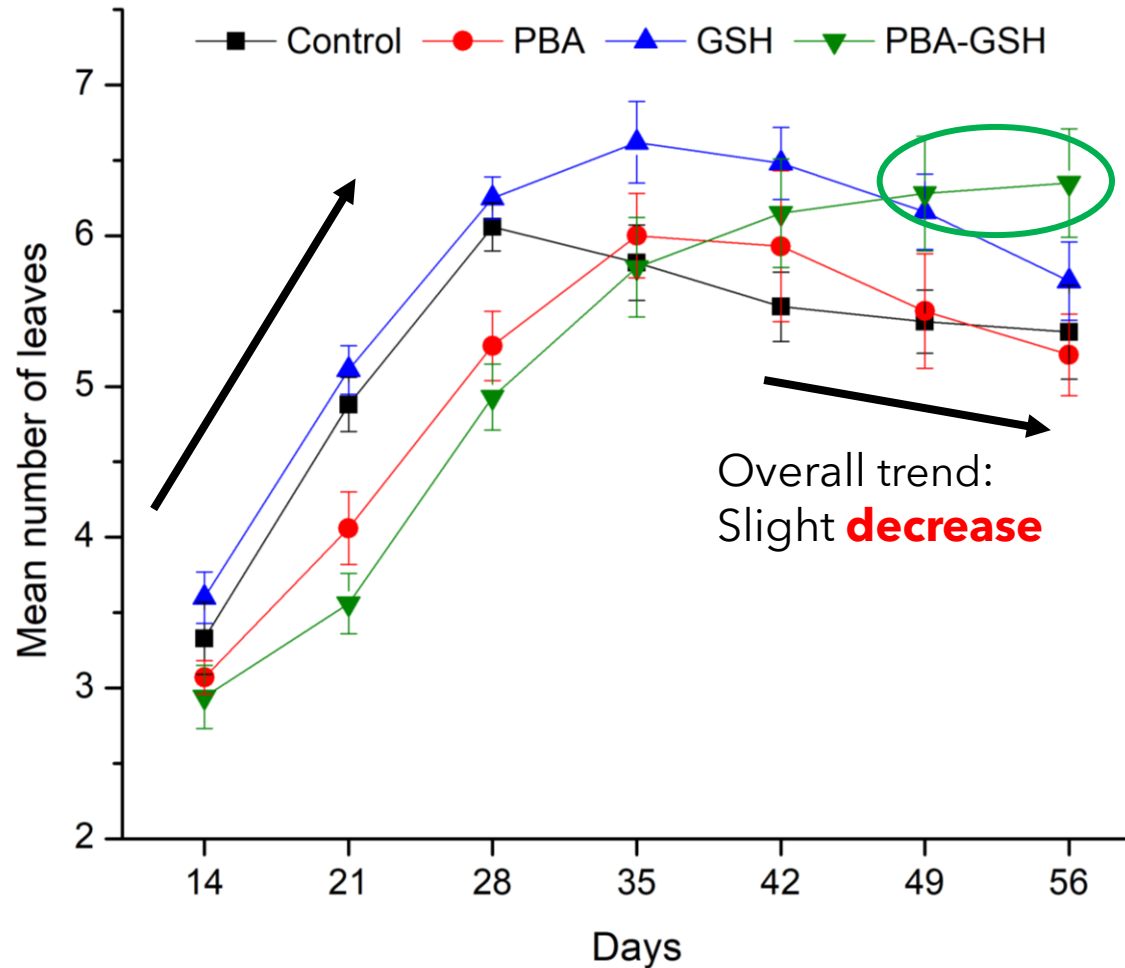

# Leaf surface area

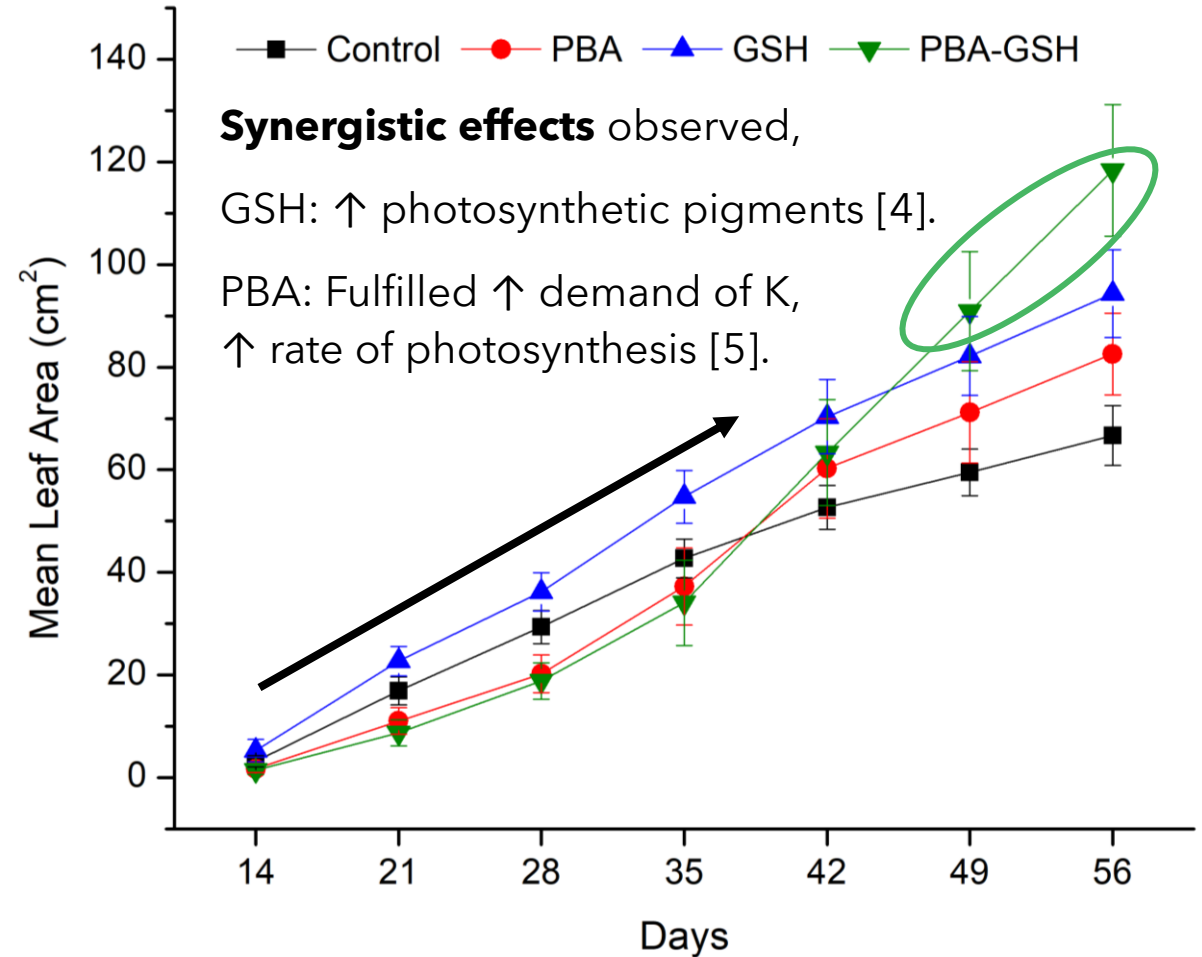

# Visual Assessment

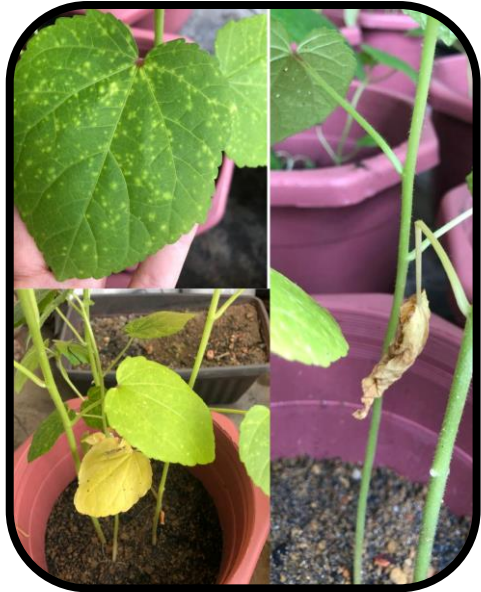

Control: White Spots, Chlorosis, Wilting

Powdery mildew: Fungus that favours high humidity [6].

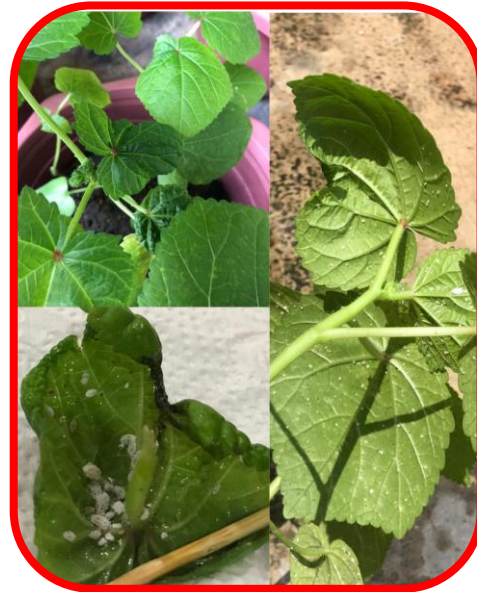

PBA: Curling & shrunk leaves, White flies and eggs

Vectors of okra enation leaf curl disease (OECD) [7];

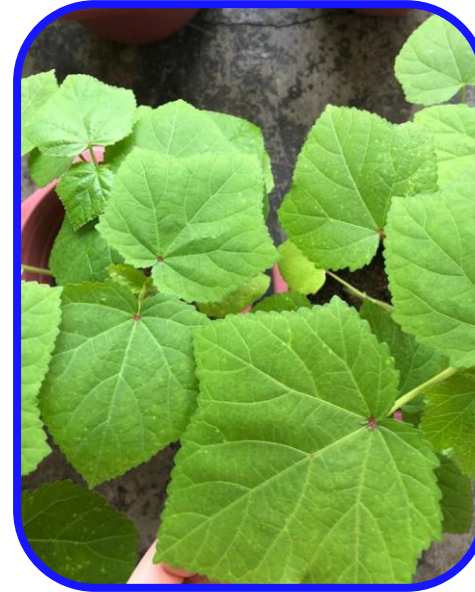

GSH: Bigger leaves with a few yellow leaves

Increased photosynthetic pigments and improved resistance to diseases; Indicates presence of more chlorophyll [5];

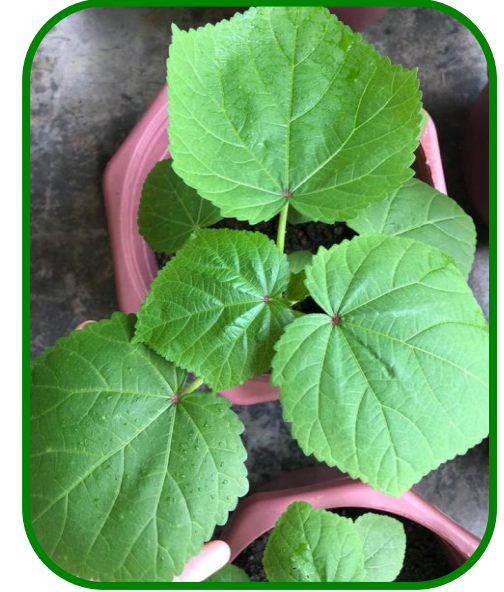

PBA-GSH: Bigger leaves with darker green



# Conclusion

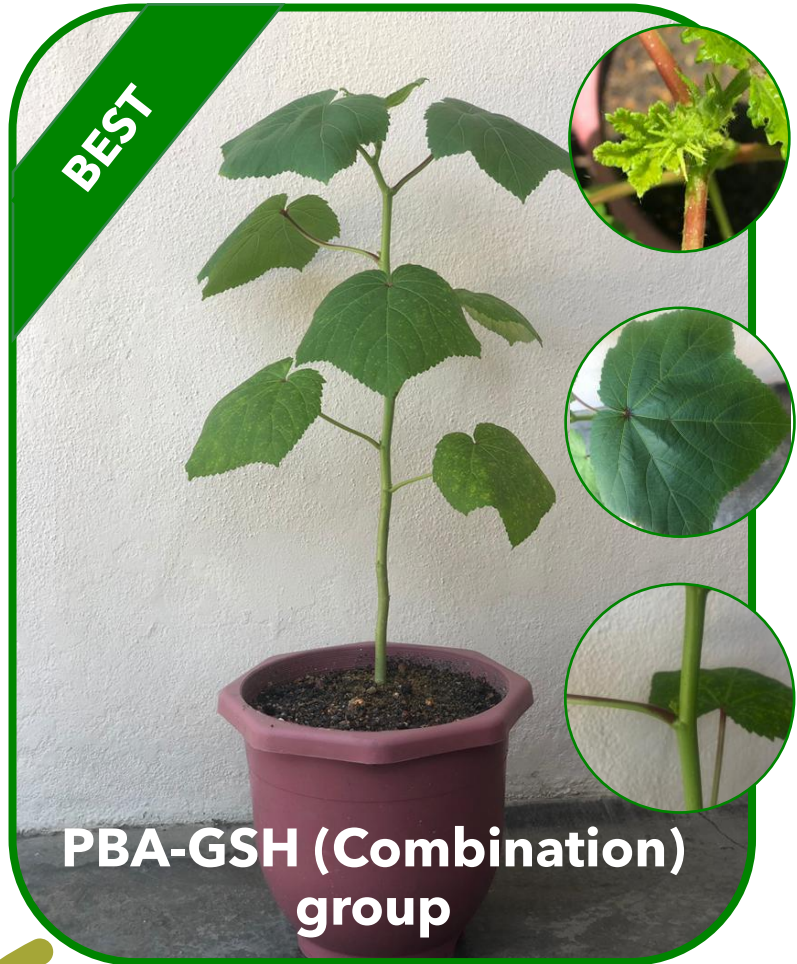

- **Synergistic effects of combination PBA-GSH group** were evident in later stages:

- **PBA** fulfilled the increasing nutrient demand
- **GSH** enhanced enzymatic and photosynthetic activities

- **Future Works:**

- **Lab analysis** of 1) Black soil and PBA composition; 2) Enzymatic and photosynthetic activities of plants
- **Encapsulation work** to produce controlled release for PBA and GSH





**Thank You**

# Acknowledgement

I would like to express my highest gratitude to:

- Dr Patrick Tang Siah Ying, Dr Goh Bey Hing, Wong See Kiat
- Chemical Engineering Department of Monash University Malaysia
- Family and friends

# References

- [1] H.C., O. (2016). Potential of Palm Bunch Ash Application on the Growth and Yield of Okra (*Abelmoschus esculentus* (L.)). *Global Journal of Biology, Agriculture & Health Sciences*, 5(1), 8. doi:10.9734/IJPSS/2013/2039.
- [2] Hasanuzzaman, M., Nahar, K., Anee, T. I., & Fujita, M. (2017). Glutathione in plants: biosynthesis and physiological role in environmental stress tolerance. *Physiology and Molecular Biology of Plants*, 23(2), 249-268. doi:10.1007/s12298-017-0422-2
- [3] Xu, X., Du, X., Wang, F., Sha, J., Chen, Q., Tian, G., Jiang, Y. (2020). Effects of Potassium Levels on Plant Growth, Accumulation and Distribution of Carbon, and Nitrate Metabolism in Apple Dwarf Rootstock Seedlings. *Frontiers in Plant Science*, 11. doi:10.3389/fpls.2020.00904
- [4] Vittoria Locato, Sara Cimini, & Gara, L. D. (2017). Glutathione as a Key Player in Plant Abiotic Stress Responses and Tolerance. In *Glutathione in Plant Growth, Development* (pp. 127-145). Unit of Food Science and Human Nutrition, Department of Medicine, Campus Bio-Medico, University of Rome, via Alvaro del Portillo 21, 00128 Rome, Italy: Springer International Publishing AG.
- [5] Nazli, F., Bushra, Iqbal, M., Bibi, F., Zafar-ul-Hye, D. M., Kashif, M. R., & Ahmad, M. (2018). Modeling the potassium requirements of potato crop for yield and quality optimization. *Asian Journal of Agriculture and Biology*, 6, 169-180.
- [6] Tripathi, K. K., Warriar, R., O.P. Govilla, & Ahuja, V. (2011). *Biology of Abelmoschus esculentus* L. (Okra). India.
- [7] Mishra, G. P., Singh, B., Seth, T., Singh, A. K., Halder, J., Krishnan, N., Singh, P. M. (2017). Biotechnological Advancements and Begomovirus Management in Okra (*Abelmoschus esculentus* L.): Status and Perspectives. *Frontiers in Plant Science*, 8(360). doi:10.3389/fpls.2017.00360
